# Supplementary material
Source: publisher figshare collection journal article supplement (https://gsajournals.figshare.com/ndownloader/files/13297307)
Supplement: Supplementary file 1 [file 13297307]

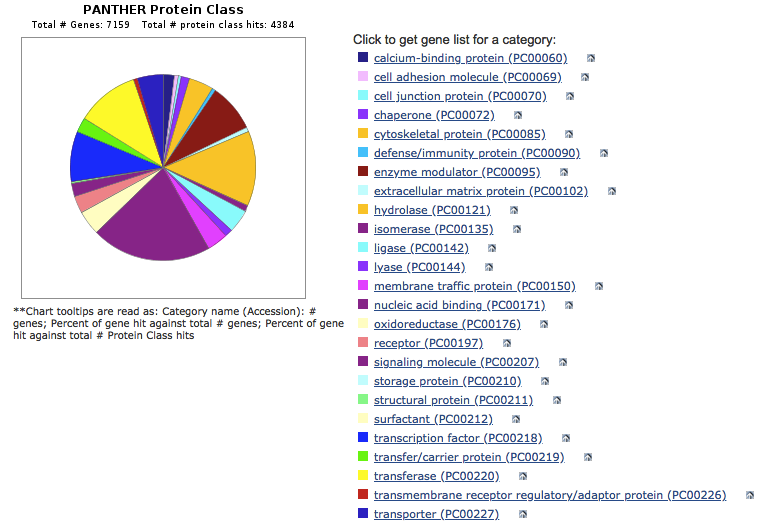


Figure S1. Pie plot of “dosage sensitive” genes categorized by protein functions. The top three are nucleic acid binding, cytoskeletal proteins, and transferases.
